# Supplementary material for: Comparative Efficacy of Biologic Disease-Modifying Anti-Rheumatic Drugs for Non-Radiographic Axial Spondyloarthritis: A Systematic Literature Review and Bucher Indirect Comparisons
Source: PubMed Central journal article supplement — Rheumatol Ther. 2023 Jan 12;10(2):307–27. doi: 10.1007/s40744-022-00522-0 (PMC10011375; doi:10.1007/s40744-022-00522-0), 2023-01-12
Supplement: 40744_2022_522_MOESM1_ESM.pdf [file 40744_2022_522_MOESM1_ESM.pdf]

## SUPPLEMENTARY MATERIAL

Comparative Efficacy of Biologic Disease-Modifying Anti-Rheumatic Drugs for Non-Radiographic Axial Spondyloarthritis: A Systematic Literature Review and Bucher Indirect Comparisons

Nurullah Akkoç,<sup>1</sup> Carlos H. Arteaga,<sup>2</sup> Simone E. Auteri,<sup>3</sup> Marissa Betts,<sup>4</sup> Kyle Fahrbach,<sup>4</sup> Mindy Kim,<sup>5</sup> Sandeep Kiri,<sup>6</sup> Binod Neupane,<sup>4</sup> Karl Gaffney,<sup>7</sup> Philip J. Mease<sup>8</sup>

1. Division of Rheumatology, Department of Medicine, Manisa Celal Bayar University School of Medicine, Manisa, Turkey
2. HEOR Value Hub, Med-I-Mart BVBA/SPRL, Helshovenstraat 23, 3840, Hoepertingen, Belgium
3. UCB Pharma, Milan, Italy
4. Evidence Synthesis, Modeling & Communication, Evidera, Waltham, MA, USA
5. UCB Pharma, Raleigh, North Carolina, USA
6. UCB Pharma, Slough, England, UK
7. Rheumatology Department, Norfolk & Norwich University Hospital, Norwich, UK
8. Swedish Medical Center/Providence St. Joseph Health and University of Washington, Seattle, WA, USA

### **9. Address for Correspondence:**

10. Nurullah Akkoc, MD, Department of Medicine, Celal Bayar University School of Medicine.
11. Mimar Sinan Blv. No: 173, 45030 Yunusemre/Manisa, Turkey.
12. Telephone: +90 (236) 236 0330
13. Email: [nurullah.akkoc@gmail.com](mailto:nurullah.akkoc@gmail.com)

**Table S. 1. PICOS Inclusion and Exclusion Criteria**

|                           | <b>Patients</b>                                                                                                                                                                 | <b>Interventions</b>                                                                                                                   | <b>Comparators</b>                                                                                                                                                                                                                                                                                                                                                                                                          | <b>Outcomes</b>                                                                                                                                                                                                                                                                                                                                                                                           | <b>Study Design</b>                                                                                                                                                                                                                                                                                                                                                                                                                                                                                                                                    |
|---------------------------|---------------------------------------------------------------------------------------------------------------------------------------------------------------------------------|----------------------------------------------------------------------------------------------------------------------------------------|-----------------------------------------------------------------------------------------------------------------------------------------------------------------------------------------------------------------------------------------------------------------------------------------------------------------------------------------------------------------------------------------------------------------------------|-----------------------------------------------------------------------------------------------------------------------------------------------------------------------------------------------------------------------------------------------------------------------------------------------------------------------------------------------------------------------------------------------------------|--------------------------------------------------------------------------------------------------------------------------------------------------------------------------------------------------------------------------------------------------------------------------------------------------------------------------------------------------------------------------------------------------------------------------------------------------------------------------------------------------------------------------------------------------------|
| <b>Inclusion Criteria</b> | Studies that include adult patients with clearly defined nr-axSpA who failed at least one NSAID agent                                                                           | TNF inhibitors: ADA, CZP, GOL, IFX, ETN, biosimilars (including, but not limited to, Cipla or Zydus Cadila)<br>IL inhibitors: SEC, IXE | TNF inhibitors: ADA, CZP, GOL, IFX, ETN, biosimilars (including but not limited to Cipla or Zydus Cadila)<br>IL inhibitors: SEC, IXE<br>Conventional DMARDs: cyclosporine, sulfasalazine, MTX, leflunomide, HCQ<br>NSAIDs: celecoxib, etoricoxib, ibuprofen, naproxen, ketoprofen, flurbiprofen, indomethacin/indomethacin, etodolac, diclofenac, aceclofenac, sulindac, piroxicam, meloxicam, tenoxicam<br>PBO/usual care* | <ul style="list-style-type: none"> <li>ASAS 20% and 40% response rate (ASAS 20, 40)</li> <li>BASDAI (pre-, post-, or mean change scores; measure of dispersion; number of patients assessed) and the BASDAI 50 responder rate</li> <li>BASFI (pre-, post-, or mean change scores; measure of dispersion; number of patients assessed)</li> <li>ASDAS-ID and ASDAS-MI</li> <li>Total spine pain</li> </ul> | PBO- and active-controlled RCTs with at least one arm randomized to one of the select TNF inhibitors alone or in combination with other comparator agents in adult patients with active nr-axSpA who failed at least one NSAID; randomized trials in parallel design of at least 12 weeks' duration, or those with crossover happening after 12 weeks                                                                                                                                                                                                  |
| <b>Exclusion Criteria</b> | Studies of non-nr-axSpA patients, those naïve to or on their first NSAID, or studies with mixed populations in which outcomes for nr-axSpA patients are not reported separately | Studies that do not include a treatment arm with any of the bDMARDs of interest                                                        | Studies that do not include a treatment arm with any of the selected comparators of interest                                                                                                                                                                                                                                                                                                                                | Studies lacking relevant data on any of the outcomes of interest                                                                                                                                                                                                                                                                                                                                          | Studies that are not randomized; letters to the editor; citations with no abstract; open-label extensions of RCTs (i.e., the extension phase where previous randomization has been broken); pooled analyses or meta-analyses; animal or in vitro studies; pharmacokinetic or pharmacodynamic studies; randomized trials with crossover happening before 12 weeks; dose-finding studies with no active or PBO comparator; randomized trials with fewer than 10 patients per treatment arm; studies with intended treatment duration fewer than 12 weeks |

\*Usual care: trials with treatment defined as “usual care” or “standard of care” will be included as active comparators in this review; studies comparing specific treatment regimens that are not on this list, such as non-pharmacologic interventions, will not be considered “usual care” unless they are defined as such by study investigators.

Abbreviations: ADA = adalimumab; CZP = certolizumab pegol; DMARD = disease-modifying anti-rheumatic drug; ETN = etanercept; GOL = golimumab; HCQ = hydroxychloroquine; IFX = infliximab; IXE = ixekizumab; MTX = methotrexate; NSAID = non-steroidal anti-inflammatory drug; nr-axSpA = non-radiographic axial spondyloarthritis; PBO = placebo; PICOS = population, intervention/comparators, outcomes and study design; PRO = patient-reported outcome; RCT = randomized controlled trial; SEC = secukinumab; SLR = systematic literature review; TNF = tumor necrosis factor

### Supplementary Figure S. 1. ASAS 20 – Forest Plot

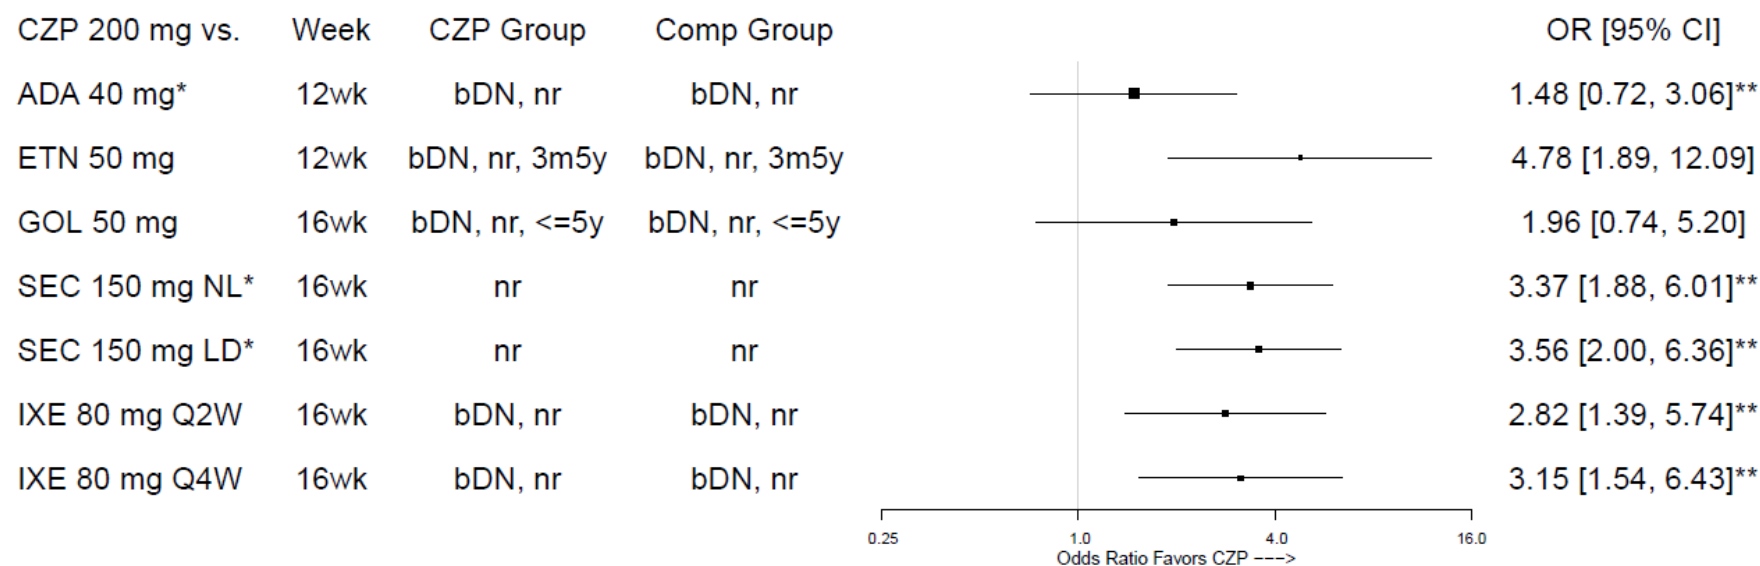

\* CZP Pooled (CZP 200 Q2W + CZP Q4W) is analyzed instead of CZP 200 mg

\*\* Random-effect model (analyses are otherwise fixed-effect models)

List of abbreviations: 3m5y = disease duration between three months and five years; <=5y = disease duration of less than or equal to five years; ADA = adalimumab; bDN = biologic Disease-modifying antirheumatic drug-naïve; CI = confidence interval; comp = comparator; CRP = C-reactive protein; CZP = certolizumab pegol; ETN = etanercept; GOL = golimumab; IXE = ixekizumab; LD = loading dose; MD = mean difference in change from baseline; mg = milligram; MRI = magnetic resonance imaging; NL = no loading dose; nr = non-radiographic axial spondyloarthritis; OR = odds ratio; Q2W = every two weeks; Q4W = every 4 weeks; SEC = secukinumab; wk = week

## Supplementary Figure S. 2. ASAS 40 – Forest Plot

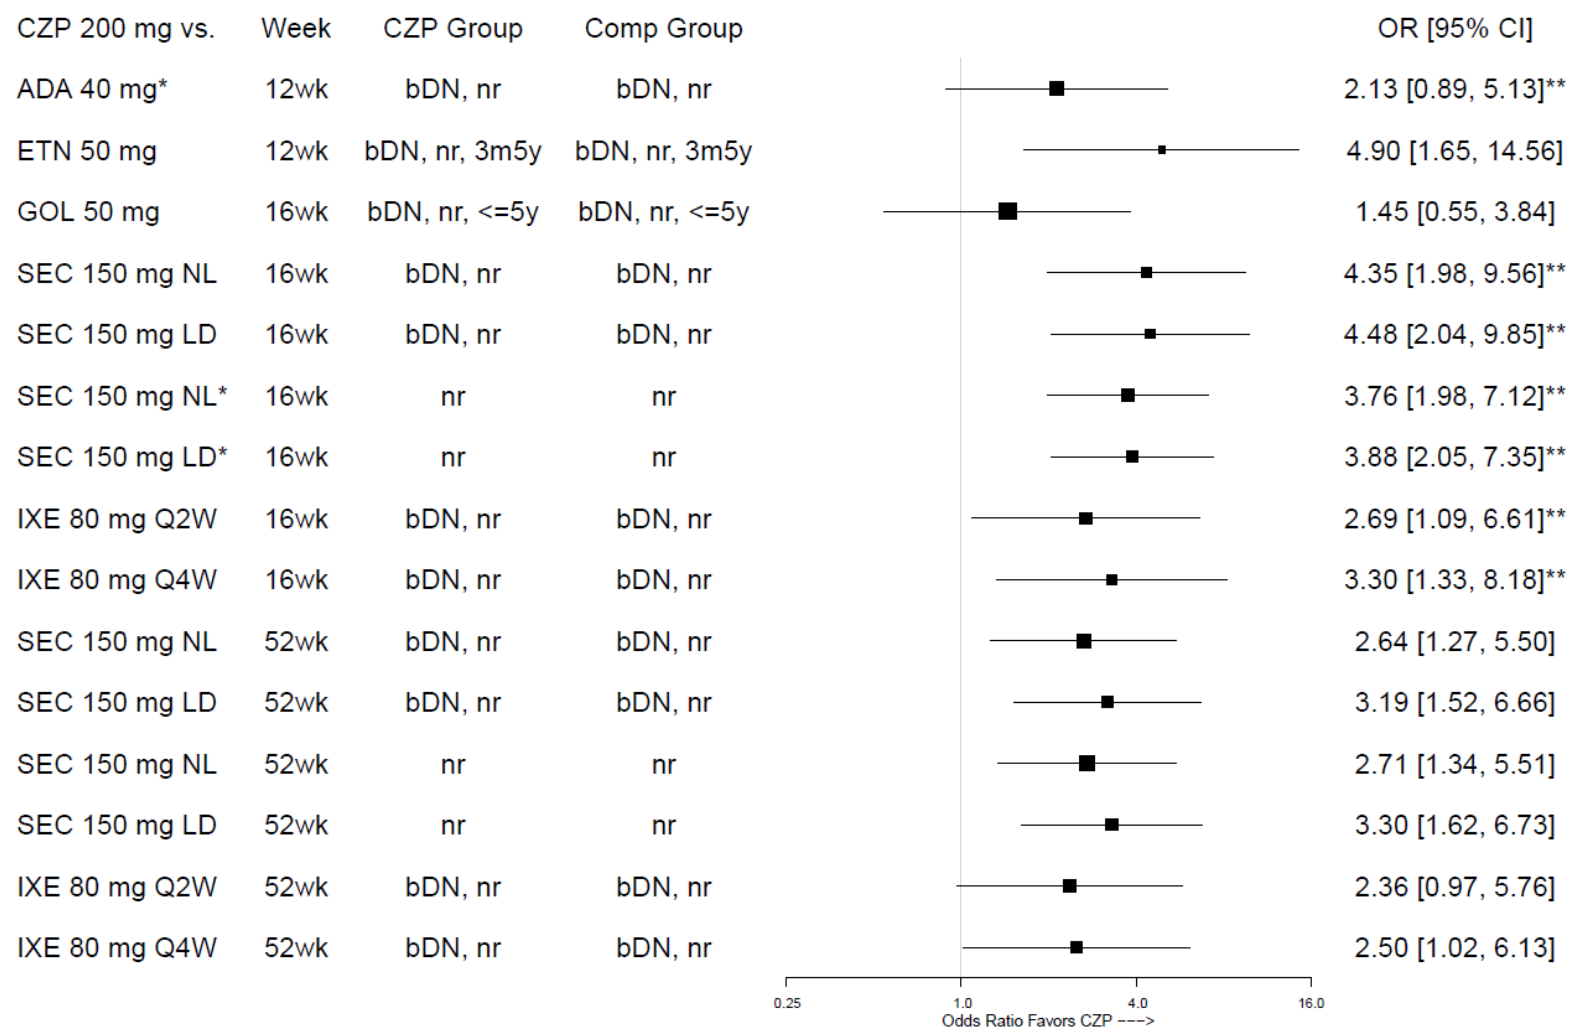

\* CZP Pooled (CZP 200 Q2W + CZP Q4W) is analyzed instead of CZP 200 mg

\*\* Random-effect model (analyses are otherwise fixed-effect models)

List of abbreviations: 3m5y = disease duration between three months and five years; <=5y = disease duration of less than or equal to five years; ADA = adalimumab; bDN = biologic Disease-modifying antirheumatic drug-naïve; CI = confidence interval; comp = comparator; CRP = C-reactive protein; CZP = certolizumab pegol; ETN = etanercept; GOL =

golimumab; IXE = ixekizumab; LD = loading dose; MD = mean difference in change from baseline; mg = milligram; MRI = magnetic resonance imaging; NL = no loading dose; nr = non-radiographic axial spondyloarthritis; OR = odds ratio; Q2W = every two weeks; Q4W = every 4 weeks; SEC = secukinumab; wk = week

**Supplementary Figure S. 3. ASDAS-ID – Forest Plot**

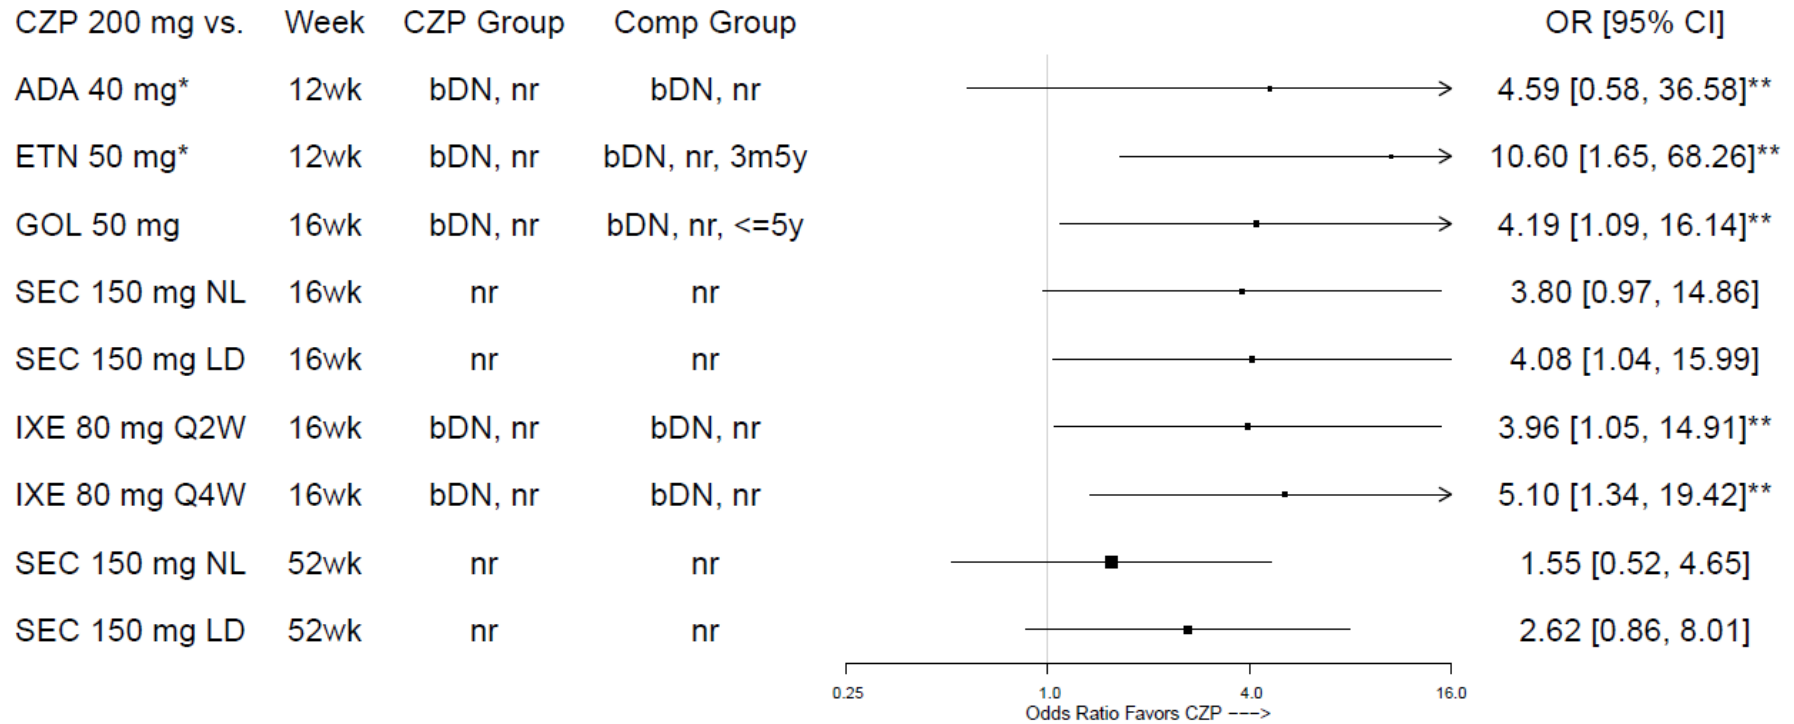

\* CZP Pooled (CZP 200 Q2W + CZP Q4W) is analyzed instead of CZP 200 mg

\*\* Random-effect model (analyses are otherwise fixed-effect models)

List of abbreviations: 3m5y = disease duration between three months and five years; <=5y = disease duration of less than or equal to five years; ADA = adalimumab; bDN = biologic Disease-modifying antirheumatic drug-naïve; CI = confidence interval; comp = comparator; CRP = C-reactive protein; CZP = certolizumab pegol; ETN = etanercept; GOL = golimumab; IXE = ixekizumab; LD = loading dose; MD = mean difference in change from baseline; mg = milligram; MRI = magnetic resonance imaging; NL = no loading dose; nr = non-radiographic axial spondyloarthritis; OR = odds ratio; Q2W = every two weeks; Q4W = every 4 weeks; SEC = secukinumab; wk = week

### Supplementary Figure S. 4. ASDAS-MI – Forest Plot

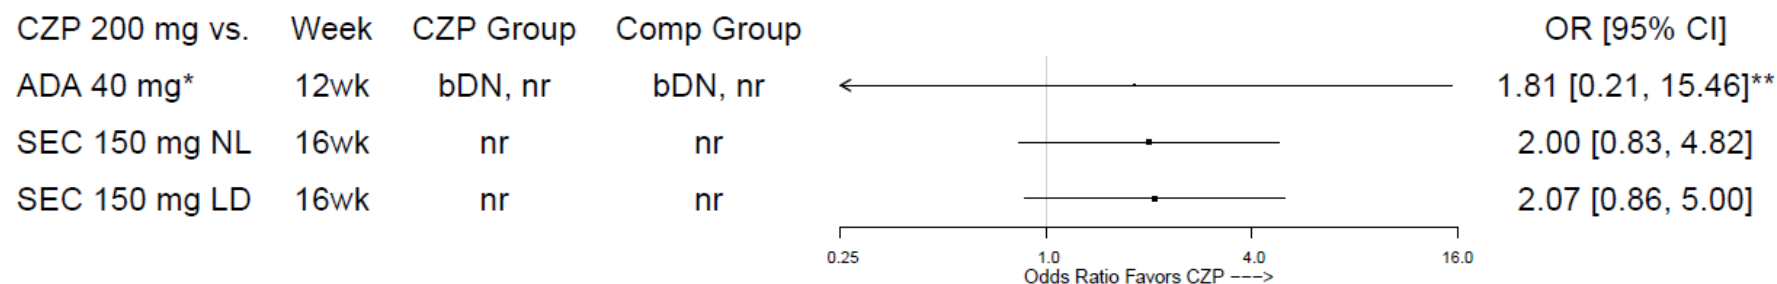

\* CZP Pooled (CZP 200 Q2W + CZP Q4W) is analyzed instead of CZP 200 mg

\*\* Random-effect model (analyses are otherwise fixed-effect models)

List of abbreviations: 3m5y = disease duration between three months and five years; <=5y = disease duration of less than or equal to five years; ADA = adalimumab; bDN = biologic Disease-modifying antirheumatic drug-naïve; CI = confidence interval; comp = comparator; CRP = C-reactive protein; CZP = certolizumab pegol; ETN = etanercept; GOL = golimumab; IXE = ixekizumab; LD = loading dose; MD = mean difference in change from baseline; mg = milligram; MRI = magnetic resonance imaging; NL = no loading dose; nr = non-radiographic axial spondyloarthritis; OR = odds ratio; Q2W = every two weeks; Q4W = every 4 weeks; SEC = secukinumab; wk = week

### Supplementary Figure S. 5. BASDAI – Forest Plot

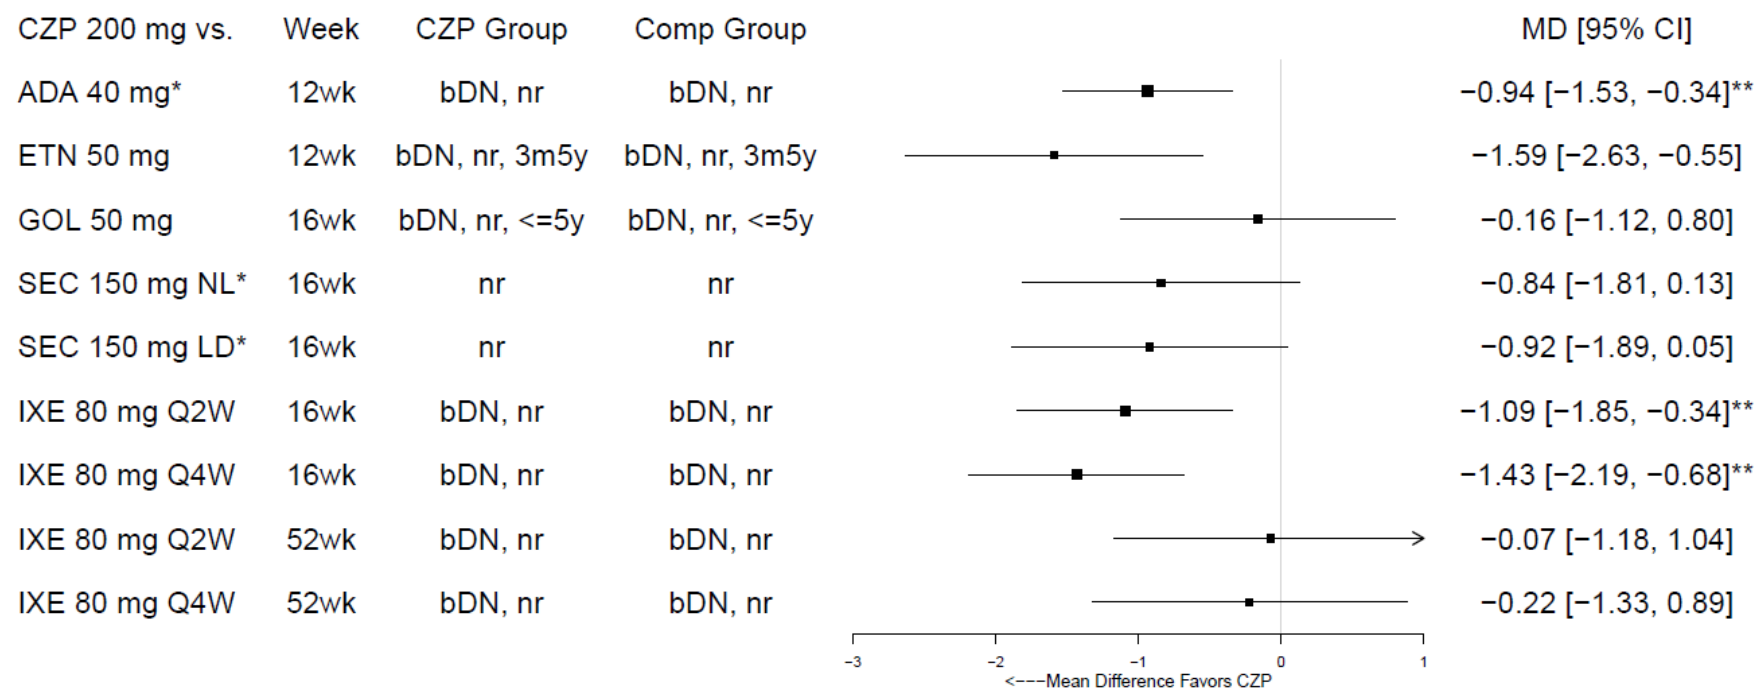

\* CZP Pooled (CZP 200 Q2W + CZP Q4W) is analyzed instead of CZP 200 mg

\*\* Random-effect model (analyses are otherwise fixed-effect models)

List of abbreviations: 3m5y = disease duration between three months and five years; <=5y = disease duration of less than or equal to five years; ADA = adalimumab; bDN = biologic Disease-modifying antirheumatic drug-naïve; CI = confidence interval; comp = comparator; CRP = C-reactive protein; CZP = certolizumab pegol; ETN = etanercept; GOL = golimumab; IXE = ixekizumab; LD = loading dose; MD = mean difference in change from baseline; mg = milligram; MRI = magnetic resonance imaging; NL = no loading dose; nr = non-radiographic axial spondyloarthritis; OR = odds ratio; Q2W = every two weeks; Q4W = every 4 weeks; SEC = secukinumab; wk = week



### Supplementary Figure S. 6. BASFI – Forest Plot

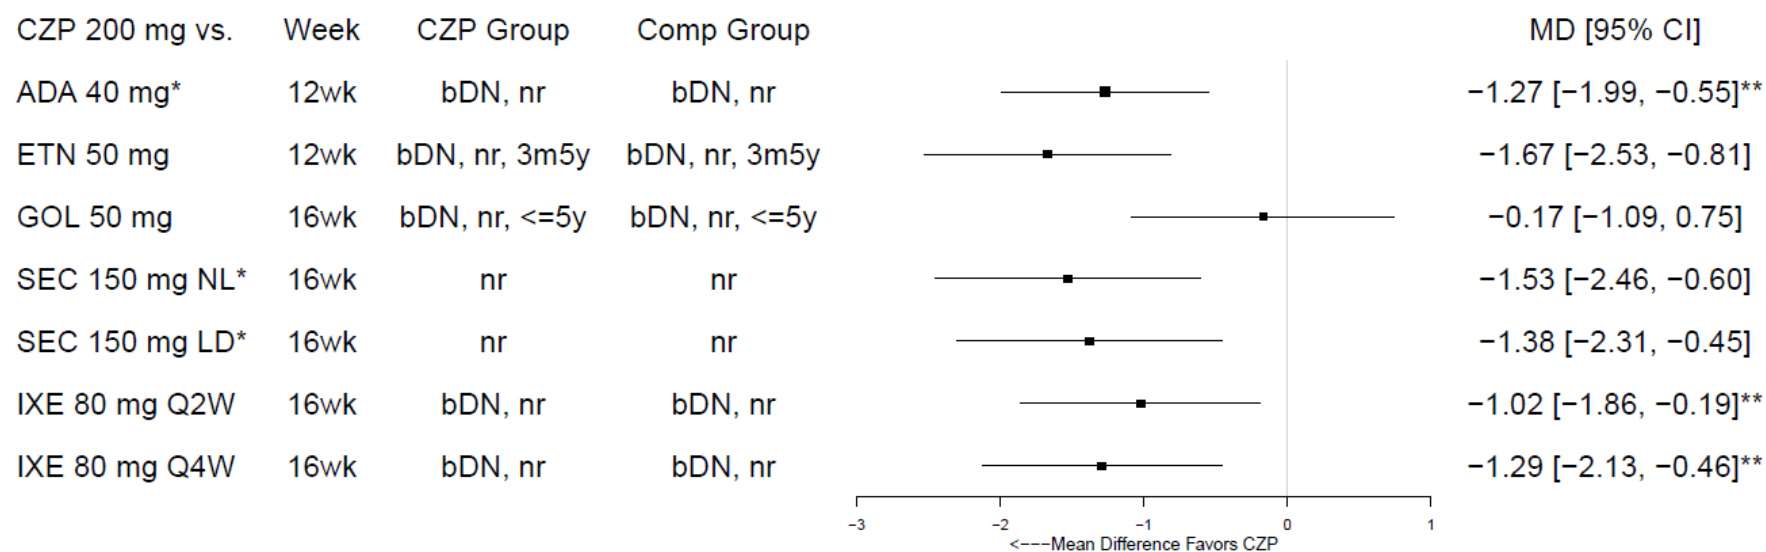

\* CZP Pooled (CZP 200 Q2W + CZP Q4W) is analyzed instead of CZP 200 mg

\*\* Random-effect model (analyses are otherwise fixed-effect models)

List of abbreviations: 3m5y = disease duration between three months and five years; <=5y = disease duration of less than or equal to five years; ADA = adalimumab; bDN = biologic Disease-modifying antirheumatic drug-naïve; CI = confidence interval; comp = comparator; CRP = C-reactive protein; CZP = certolizumab pegol; ETN = etanercept; GOL = golimumab; IXE = ixekizumab; LD = loading dose; MD = mean difference in change from baseline; mg = milligram; MRI = magnetic resonance imaging; NL = no loading dose; nr = non-radiographic axial spondyloarthritis; OR = odds ratio; Q2W = every two weeks; Q4W = every 4 weeks; SEC = secukinumab; wk = week

### Supplementary Figure S. 7. Total Spine Pain – Forest Plot

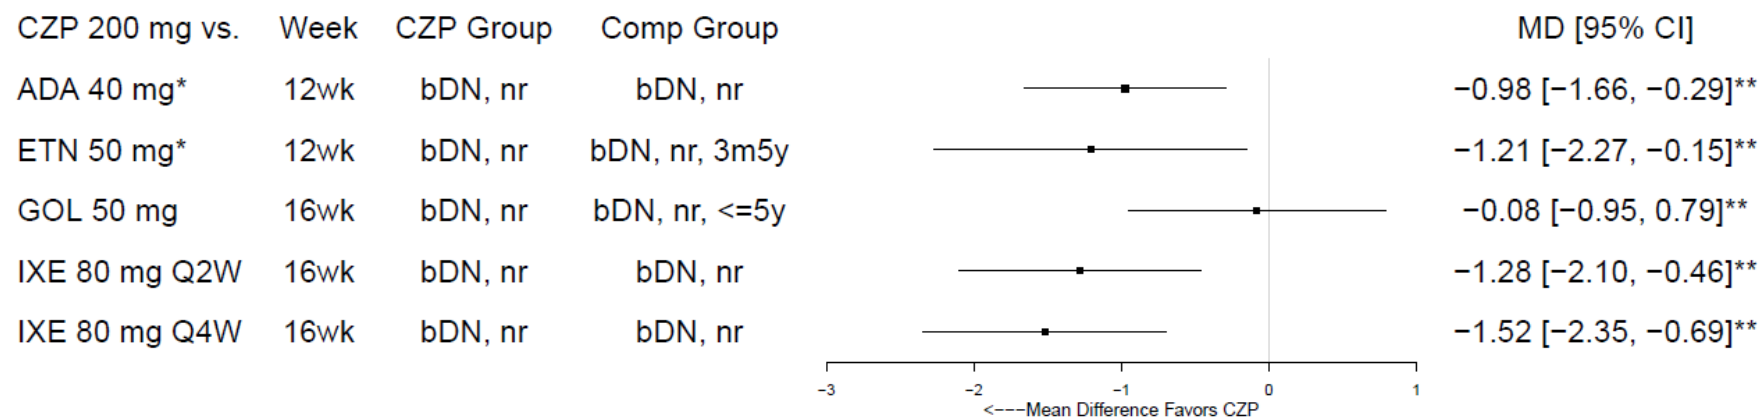

\* CZP Pooled (CZP 200 Q2W + CZP Q4W) is analyzed instead of CZP 200 mg

\*\* Random-effect model (analyses are otherwise fixed-effect models)

List of abbreviations: 3m5y = disease duration between three months and five years; <=5y = disease duration of less than or equal to five years; ADA = adalimumab; bDN = biologic Disease-modifying antirheumatic drug-naïve; CI = confidence interval; comp = comparator; CRP = C-reactive protein; CZP = certolizumab pegol; ETN = etanercept; GOL = golimumab; IXE = ixekizumab; LD = loading dose; MD = mean difference in change from baseline; mg = milligram; MRI = magnetic resonance imaging; NL = no loading dose; nr = non-radiographic axial spondyloarthritis; OR = odds ratio; Q2W = every two weeks; Q4W = every 4 weeks; SEC = secukinumab; wk = week

### Supplementary Figure S. 8. ASAS 40, Other MRI and CRP Subgroups – Forest Plot

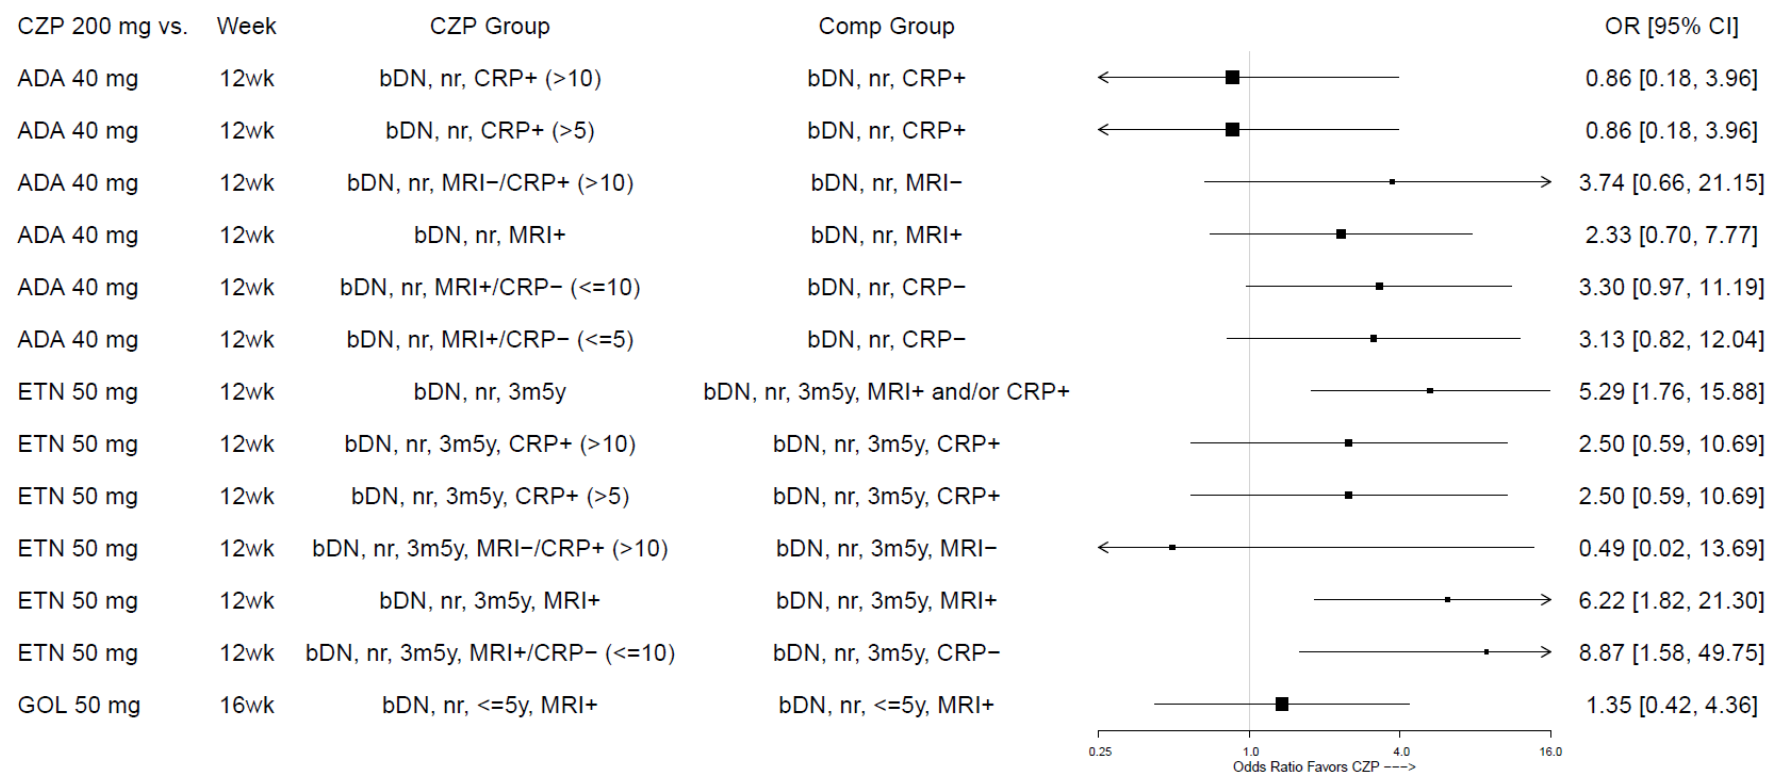

\* CZP Pooled (CZP 200 Q2W + CZP Q4W) is analyzed instead of CZP 200 mg

\*\* Random-effect model (analyses are otherwise fixed-effect models)

List of abbreviations: 3m5y = disease duration between three months and five years; <=5y = disease duration of less than or equal to five years; ADA = adalimumab; bDN = biologic Disease-modifying antirheumatic drug-naïve; CI = confidence interval; comp = comparator; CRP = C-reactive protein; CZP = certolizumab pegol; ETN = etanercept; GOL = golimumab; IXE = ixekizumab; LD = loading dose; MD = mean difference in change from baseline; mg = milligram; MRI = magnetic resonance imaging; NL = no loading dose; nr = non-radiographic axial spondyloarthritis; OR = odds ratio; Q2W = every two weeks; Q4W = every 4 weeks; SEC = secukinumab; wk = week
